# Supplementary material
Source: Elsevier journal article supplement (https://www.sciencedirect.com/science/article/pii/S0123901517301324)
Supplement: mmc1 [file S0123901517301324:mmc1.docx]

**Anexo 1**

A continuación se le invita a participar en una encuesta sobre los estudios de investigación en cáncer con fines académicos, esta información es confidencial y no se divulgará ningún dato de identificación. Le agradecemos su colaboración y le rogamos responder con toda sinceridad.

1. **Secuencial** __
2. **Fecha de recolección** DD/MM/AA

**INFORMACIÓN GENERAL**

1. **Iniciales del paciente** _ _ _
2. **Edad en años cumplidos** _ _
3. **Sexo:** Mujer _ Hombre _
4. **Procedencia:** _ Nombre del municipio
5. **Nivel educativo:** _Ninguno_ Primaria incompleta_ Primaria completa _Secundaria incompleta _Secundaria completa _ Técnico _Universitario _ Postgrado
6. **Estrato socioeconómico:** 1_ 2_ 3_ 4_ 5_ 6_ sin información
7. **Estado civil:** Casado_ Soltero_ Unión libre_ Viudo_ Otro_
8. **Ocupación actual:** Desempleado_ Empleado_ Pensionado_ Independiente_ Otro_
9. **Afiliación al SGSSS:** R. subsidiado_ R. contributivo_ medicina prepagada_ sin afiliación_
10. **Tipo de cáncer: _ _ _ _ _ _ _ _ _ _ _ _ _ _**
11. **Estadio del cáncer:** Estadio I__ Estadio II__ Estadio III __ Estadio IV __

**INFORMACIÓN ACERCA DE LOS ENSAYOS CLÍNICOS**

1. **¿Ha participado alguna vez en un ensayo clínico?**

• Sí

• No

1. **¿Sabe usted qué es un ensayo clínico?**

- Sí
- No

1. **¿Conoce usted los derechos de participar en los ensayos clínicos?**

• Sí

• No

**Si la respuesta es sí:**

¿Cuáles conoce?

__________________________________________________________________________________________________________________________________________

1. **¿Sabe usted qué es el consentimiento informado?**

- Sí
- No

1. **¿Conoce usted los riesgos de participar en los ensayos clínicos?**

- Sí
- No

**Si la respuesta es sí:**

¿Cuáles conoce?

________________________________________________________________________________________________________________________________________________

1. **¿Conoce usted los beneficios de participar en los ensayos clínicos?**

- Sí
- No

**Si la respuesta es sí:**

¿Cuáles conoce?

__________________________________________________________________________________________________________________________________________

1. **¿Conoce qué es una asignación aleatoria?**

- Sí
- No

1. **¿Sabe usted qué es un placebo?**

- Sí
- No

1. **¿Estaría dispuesto a participar en un ensayo clínico?**

- Sí
- No

**Si la respuesta es sí:**

¿Cuál sería el principal motivo para participar?

- Intereses personales
- Relacionados con su atención y cuidado de su salud
- Deseo de ayudar a otros pacientes
- Otro

**Si la respuesta es no:**

¿Por qué?

________________________________________________________________________________________________________________________________________________

1. **¿Necesitaría un tiempo para pensar en su decisión?**

• Sí

• No

**¿Y si para tomar la decisión usted consultaría con otra persona, quien?**

- Cónyuge
- Familiar
- Hijo
- Otra persona
